# Supplementary material for: Improved lifestyle is associated with improved depression, anxiety and well-being over time in UK healthcare professionals during the COVID-19 pandemic: insights from the CoPE-HCP cohort study
Source: PubMed Central journal article supplement — Gen Psychiatr. 2023 Jan 20;36(1):e100908. doi: 10.1136/gpsych-2022-100908 (PMC9895916; doi:10.1136/gpsych-2022-100908), 2023-01-20

### Supplementary Tables and Figures

**Supplementary Table 1.** Baseline demographic, social and educational characteristics, and comorbidities of HCPs (N = 613).

| Characteristic             | Response                              | HCPs (N = 613) (%) |
|----------------------------|---------------------------------------|--------------------|
| Age                        | 18-25 years                           | 22 (3.6)           |
|                            | 26-35 years                           | 149 (24.3)         |
|                            | 36-50 years                           | 239 (39.0)         |
|                            | 51-60 years                           | 156 (25.5)         |
|                            | 61-70 years                           | 44 (7.2)           |
|                            | > 70 years                            | 3 (0.5)            |
| Ethnicity                  | White                                 | 496 (80.9)         |
|                            | Asian                                 | 60 (9.8)           |
|                            | Black                                 | 24 (3.9)           |
|                            | Mixed                                 | 18 (2.9)           |
|                            | Other                                 | 9 (1.5)            |
|                            | Prefer not to say                     | 6 (1.0)            |
| Gender identity            | Female                                | 470 (76.7)         |
|                            | Male                                  | 139 (22.7)         |
|                            | Prefer not to say                     | 3 (0.5)            |
|                            | Prefer to self-define                 | 1 (0.2)            |
| Relationship status        | Divorced                              | 21 (3.4)           |
|                            | I prefer not to disclose              | 16 (2.6)           |
|                            | Married/Living with partner or family | 402 (65.6)         |
|                            | Other (please specify)                | 20 (3.3)           |
|                            | Single                                | 154 (25.1)         |
| Number living in household | 1                                     | 94 (15.3)          |
|                            | 2                                     | 208 (33.9)         |
|                            | 3-5                                   | 299 (48.8)         |
|                            | 6 or more                             | 12 (2.0)           |
| Highest level of education | GCSEs or A-levels                     | 49 (8.0)           |
|                            | Bachelor's degree/diploma             | 296 (48.3)         |
|                            | Master's degree or PhD                | 236 (38.5)         |
|                            | Other                                 | 32 (5.2)           |

*Note.* All demographic data is self-reported. 'Asian' category includes South Asian, Chinese, and any other Asian background. 'Mixed' category includes mixed Black and White, mixed Asian and White, and mixed any other/multiple ethnic backgrounds. Number living in household includes themselves.

**Supplementary Table 2.** Mean total lifestyle score at baseline and follow-up in UK HCPs (n, 613).

| <b>Lifestyle score (n, 613)</b> | <b>Mean</b> | <b>Range</b> |
|---------------------------------|-------------|--------------|
| Total score at baseline         | -0.11       | -4 to 3      |
| Total score at follow-up        | -0.20       | -4 to 3      |
| Change in score                 | -0.09       | -4.5 to 5    |

**Supplementary Fig 1.** Unadjusted plots for change in mean mental health scores from baseline to follow-up in UK HCPs, grouped by tertiles of lifestyle change score.

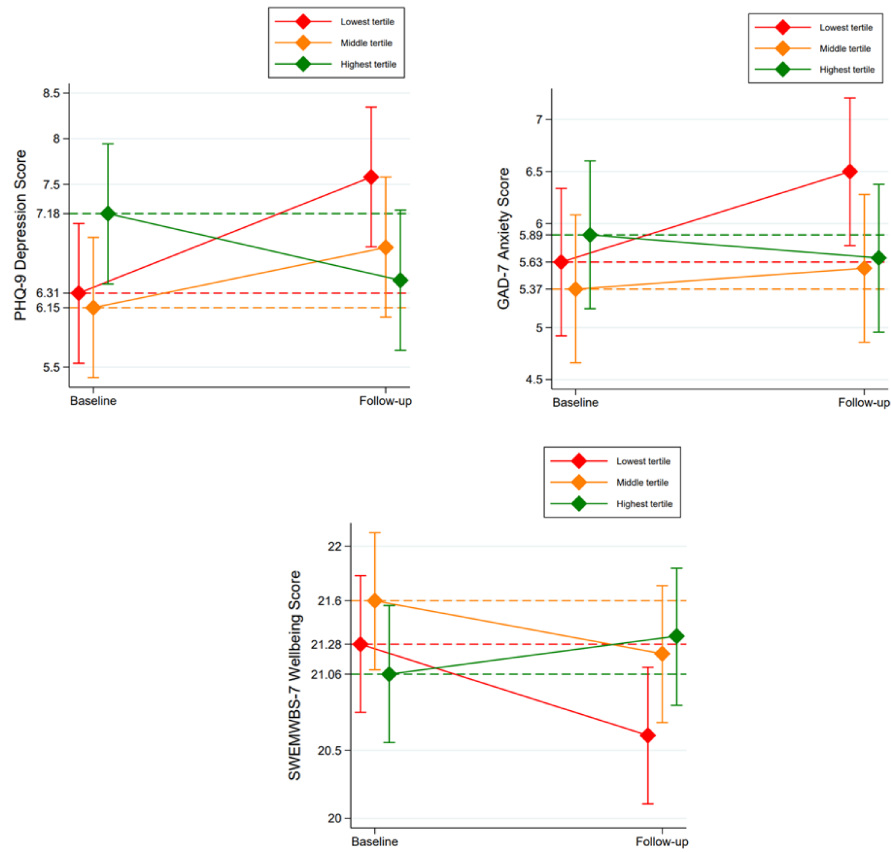

Supplement: gpsych-2022-100908supp001.pdf [file gpsych-2022-100908supp001.pdf]
